# Supplementary material for: A generalized strategy for controlled synthesis of ternary metal sulfide nanocrystals
Source: Royal Society of Chemistry journal article supplement (doi:10.1039/c3nj00928a), 2013-10-03
Supplement: c3nj00928a.pdf [file c3nj00928a.pdf]

## Supporting Information

# A Generalized Strategy for Controlled Synthesis of Ternary Metal Sulfide Nanocrystals

Manjiao Deng, Shuling Shen, Yejun Zhang, Huarui Xu, Qiangbin Wang

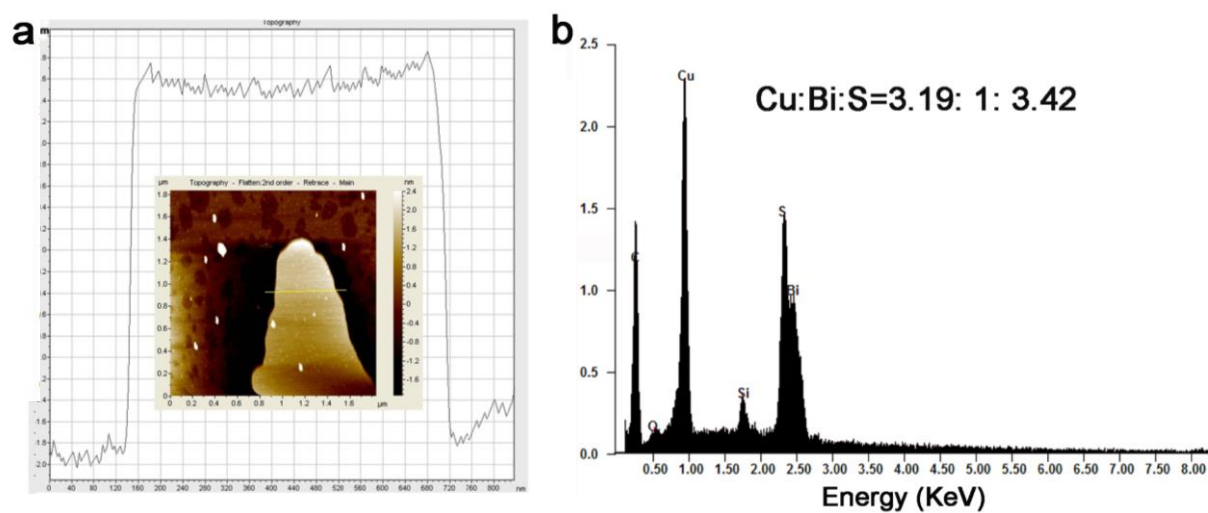

Figure S1. AFM image (a) and EDS pattern (b) of  $\text{Cu}_3\text{BiS}_3$  nanosheets. Thickness of  $\text{Cu}_3\text{BiS}_3$  nanosheets is about 4 nm.

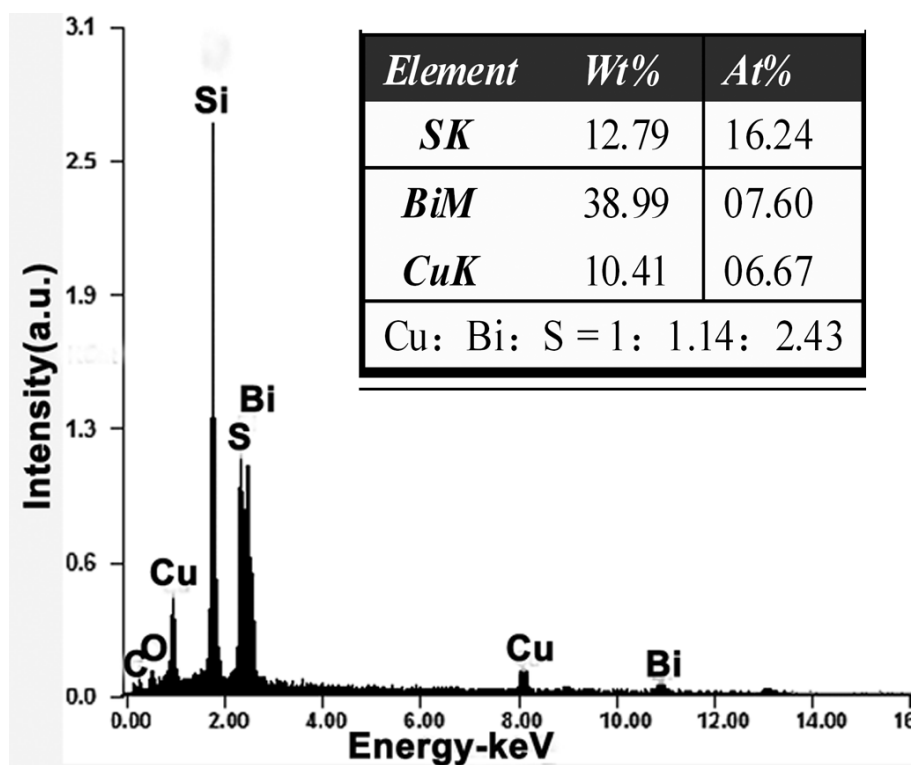

Figure S2. EDS pattern of  $\text{Cu}_4\text{Bi}_4\text{S}_9$  nanowires.

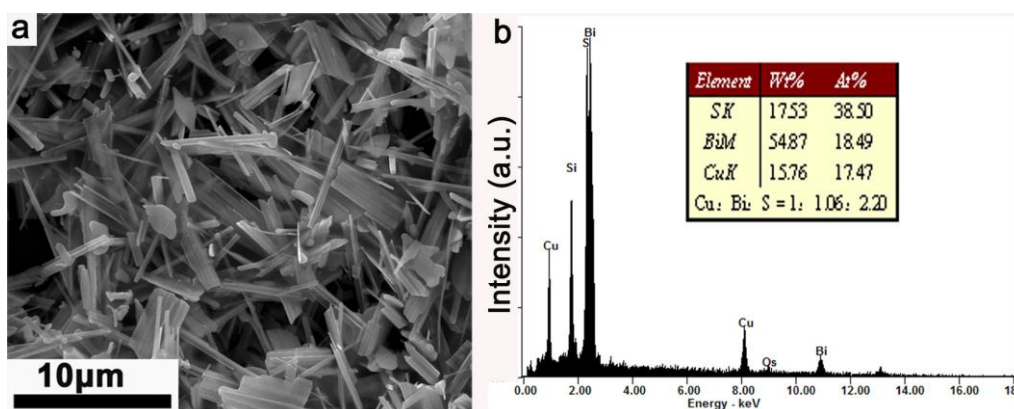

Figure S3. SEM image (a) and EDS pattern (b) of  $\text{Cu}_4\text{Bi}_4\text{S}_9$  nanoribbons.

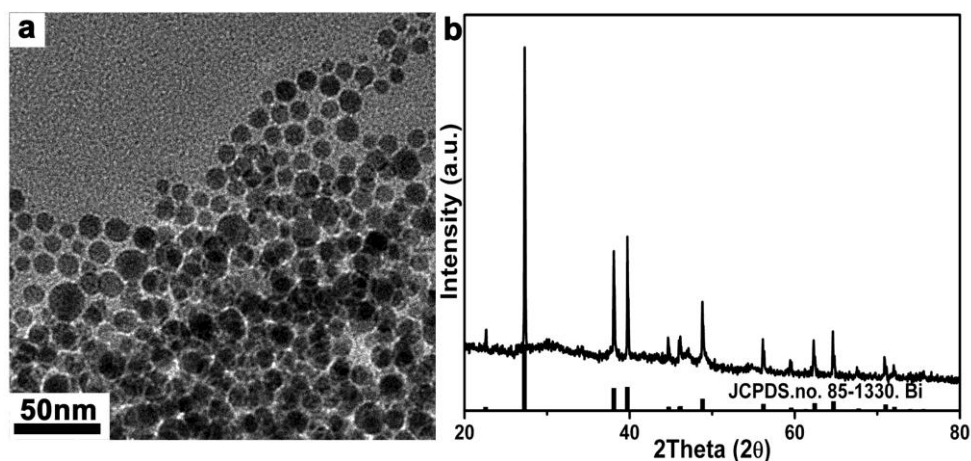

Figure S4. TEM image (a) and XRD pattern (b) of Bi nanoparticles synthesized by  $\text{Cu}(\text{DDTC})_2$  and  $\text{Bi}(\text{DDTC})_3$  in the DT solution at 220 °C for 1 h.

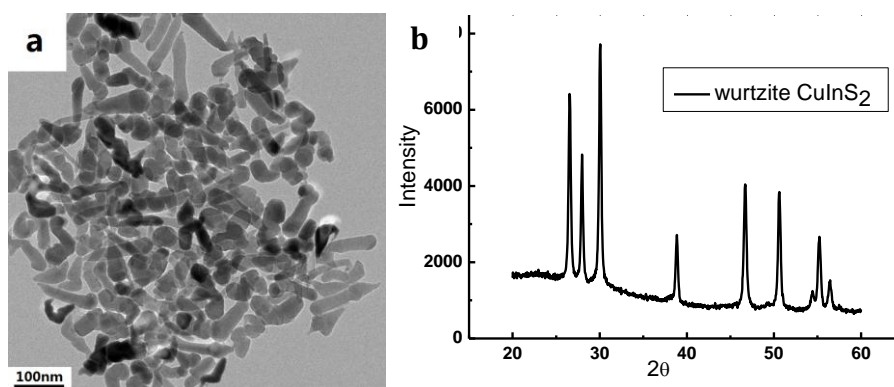

Figure S5. TEM image (a) and XRD pattern (b) of tadpole-shaped  $\text{CuInS}_2$  nanoparticles synthesized at  $\text{Cu}(\text{DDTC})_2\text{Phen} : \text{In}(\text{DDTC})_3=1:1$  in the DT solution at 240 °C for 1 h.

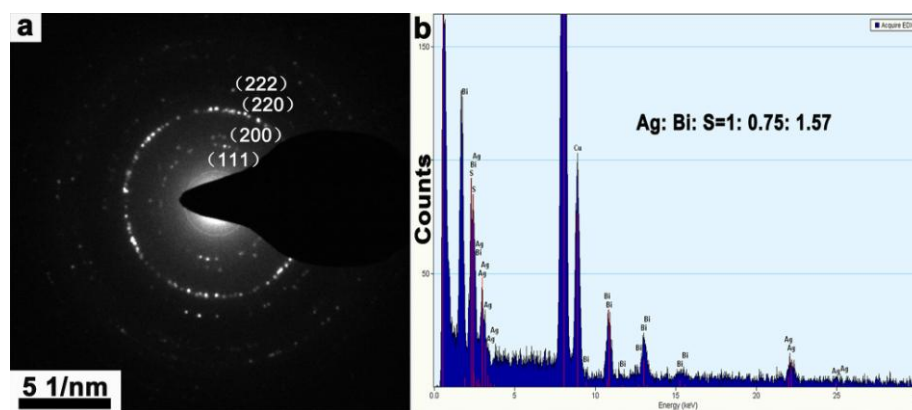

Figure S6. SAED pattern (a) and EDS pattern (b) of  $\text{AgBiS}_2$  nanoparticles.

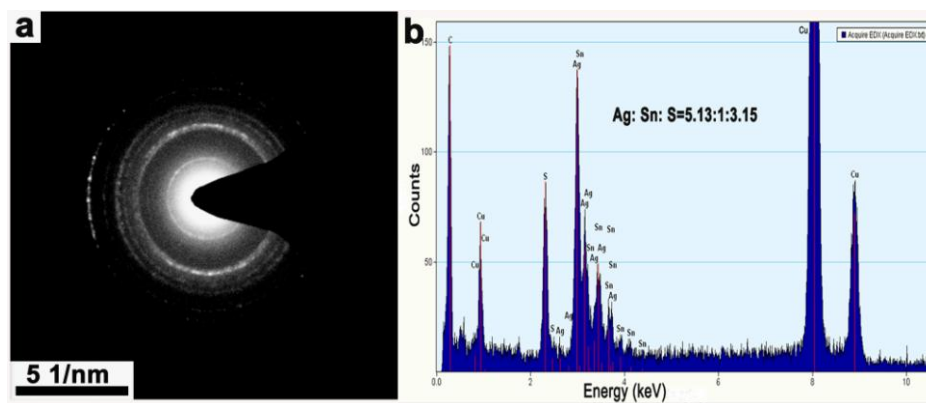

Figure S7. SAED pattern (a) and EDS pattern (b) of  $\text{Ag}_8\text{SnS}_6$  nanoparticles.
